# Supplementary material for: The steatosis‐associated fibrosis estimator score is a useful indicator of recurrence and survival after initial curative hepatectomy for hepatocellular carcinoma
Source: PubMed Central journal article supplement — Ann Gastroenterol Surg. 2024 Jul 23;9(1):178–87. doi: 10.1002/ags3.12846 (PMC11693554; doi:10.1002/ags3.12846), 2024-07-23
Supplement: AGS3-9-178-s002.pdf [file AGS3-9-178-s002.pdf]

# Supplemental Fig 1

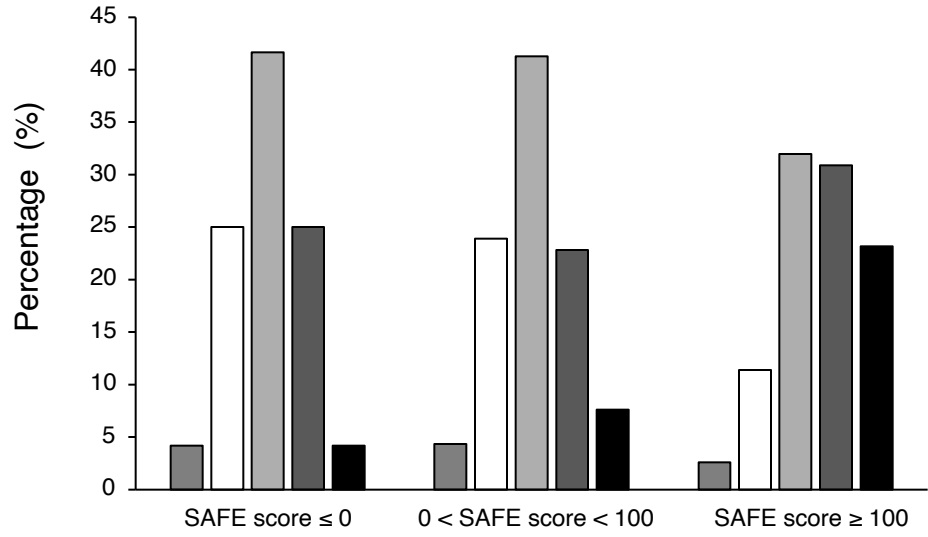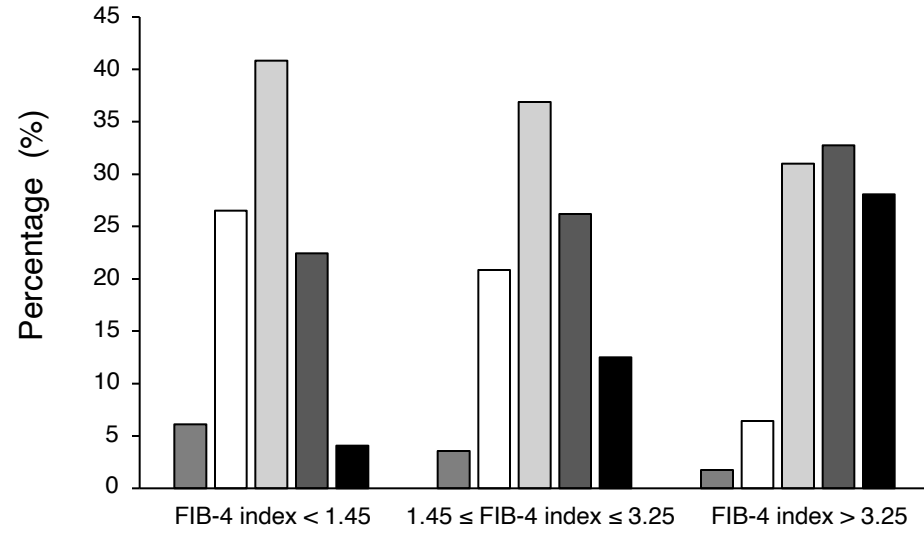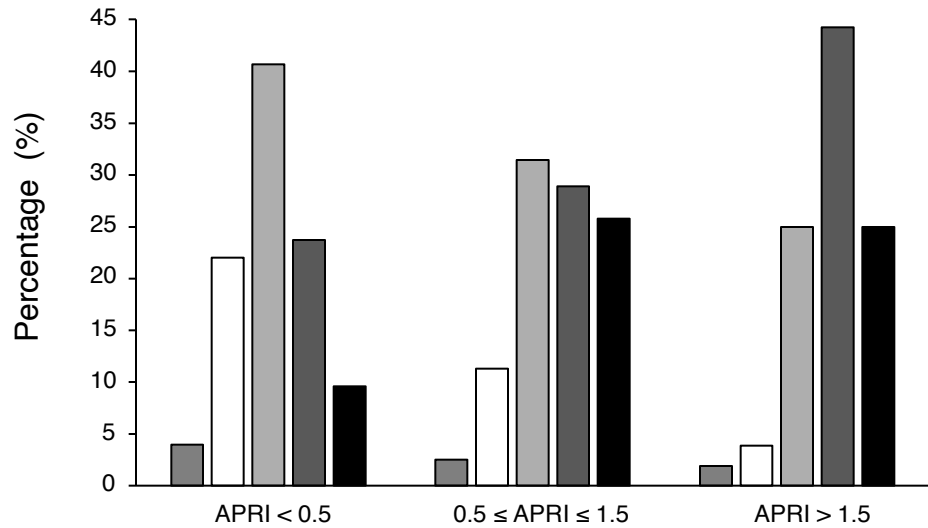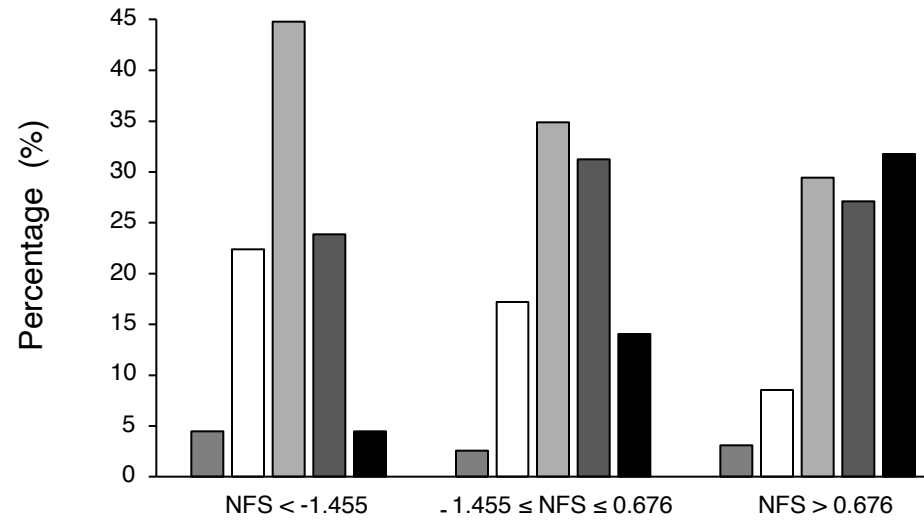

## New Inuyama classification

- Class 0
- Class 1
- Class 2
- Class 3
- Class 4

# Supplemental Fig 2

## a) Non virus

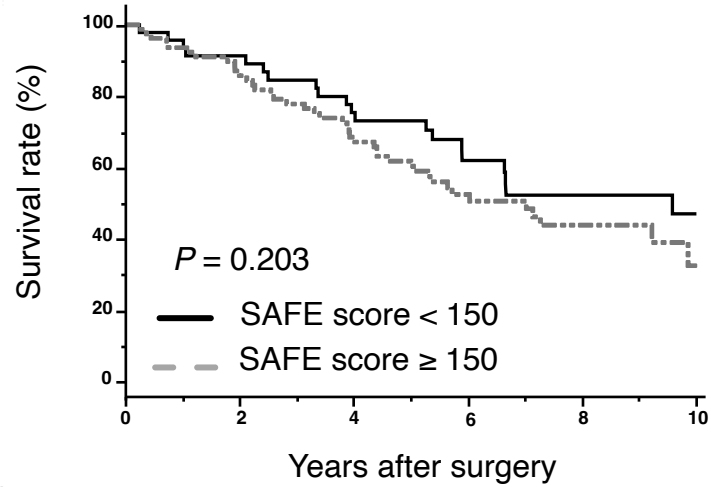

| Patients at risk      | 0  | 2  | 4  | 6  | 8  | 10 |
|-----------------------|----|----|----|----|----|----|
| SAFE score < 150      | 46 | 42 | 34 | 22 | 14 | 9  |
| SAFE score $\geq 150$ | 79 | 66 | 52 | 29 | 14 | 6  |

## b) Virus

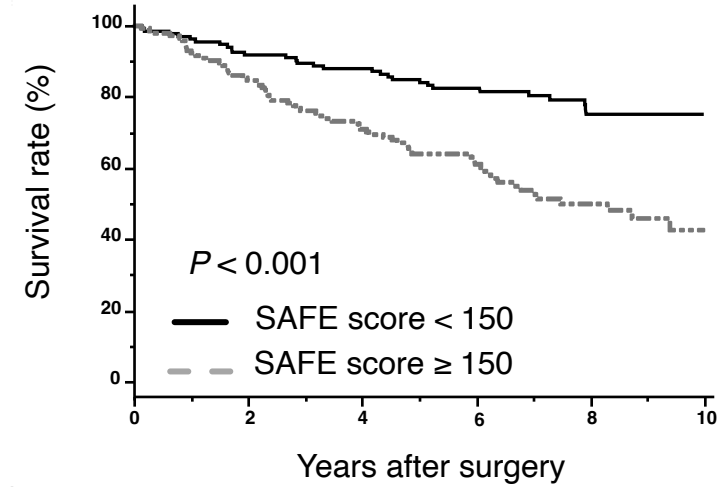

| Patients at risk      | 0   | 2   | 4   | 6  | 8  | 10 |
|-----------------------|-----|-----|-----|----|----|----|
| SAFE score < 150      | 136 | 123 | 116 | 90 | 57 | 34 |
| SAFE score $\geq 150$ | 146 | 123 | 95  | 64 | 32 | 9  |

# Supplemental Fig 3

a) Non virus

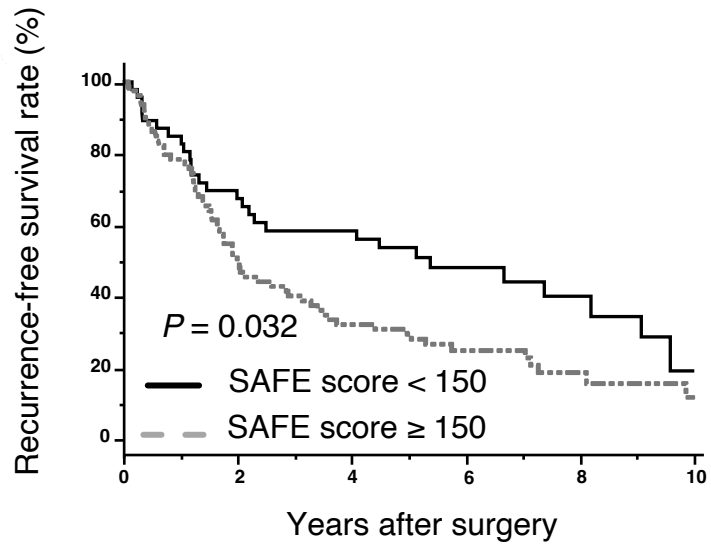

| Patients at risk      | 0  | 2  | 4  | 6  | 8 | 10 |
|-----------------------|----|----|----|----|---|----|
| SAFE score < 150      | 46 | 31 | 26 | 15 | 9 | 2  |
| SAFE score $\geq 150$ | 79 | 38 | 25 | 15 | 7 | 4  |

b) Virus

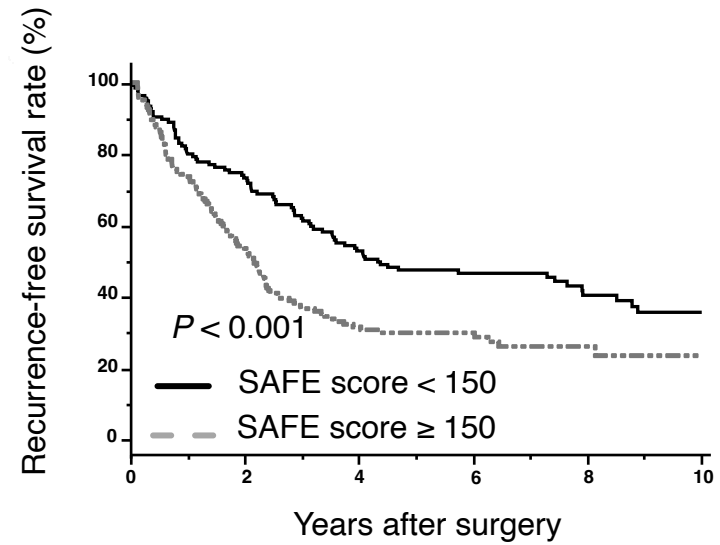

| Patients at risk      | 0   | 2  | 4  | 6  | 8  | 10 |
|-----------------------|-----|----|----|----|----|----|
| SAFE score < 150      | 136 | 98 | 70 | 52 | 32 | 16 |
| SAFE score $\geq 150$ | 146 | 78 | 41 | 25 | 11 | 5  |
